# Supplementary material for: Environmental Controls to Soil Heavy Metal Pollution Vary at Multiple Scales in a Highly Urbanizing Region in Southern China
Source: MDPI journal article supplement (doi:10.3390/s22124496), 2022-06-14
Supplement: s1 [file s1]

**Table S1.** Statistics of soil heavy metal pollution as indicated by the geo-accumulative indices (N=318)

|                     | Minimum | Maximum | Median | Mean  | Standard deviation | Skewness | Kurtosis |
|---------------------|---------|---------|--------|-------|--------------------|----------|----------|
| I <sub>geo</sub> As | -5.75   | 2.81    | -0.70  | -0.67 | 1.43               | -0.18    | -0.38    |
| I <sub>geo</sub> Cd | -5.49   | 6.49    | 1.91   | 1.90  | 1.48               | 0.07     | 3.33     |
| I <sub>geo</sub> Cr | -5.44   | 2.39    | -0.97  | -1.11 | 1.24               | -0.77    | 1.07     |
| I <sub>geo</sub> Cu | -5.76   | 4.94    | 0.35   | 0.40  | 1.07               | -0.14    | 4.84     |
| I <sub>geo</sub> Hg | -5.23   | 4.63    | -0.45  | -0.23 | 1.66               | 0.35     | 0.29     |
| I <sub>geo</sub> Ni | -4.82   | 4.37    | -0.09  | -0.25 | 1.05               | -0.50    | 2.21     |
| I <sub>geo</sub> Pb | -2.59   | 3.32    | 0.10   | 0.05  | 0.78               | 0.15     | 1.51     |
| I <sub>geo</sub> Zn | -1.72   | 3.66    | 0.73   | 0.78  | 0.78               | 0.48     | 1.22     |

**Table S2.** General correlation coefficients among soil contamination and environmental variables by Pearson correlation analysis. Numbers in italic and bold represent significant at  $p<0.05$ .

|         | <i>Igeo-</i> |             |              |              |             |              |              |              |
|---------|--------------|-------------|--------------|--------------|-------------|--------------|--------------|--------------|
|         | As           | Cd          | Cr           | Cu           | Hg          | Ni           | Pb           | Zn           |
| pH      | <b>0.28</b>  | <b>0.31</b> | 0.01         | <b>0.21</b>  | -0.02       | 0.07         | <b>0.30</b>  | <b>0.29</b>  |
| SOM     | 0.06         | <b>0.29</b> | <b>0.25</b>  | <b>0.27</b>  | <b>0.41</b> | <b>0.43</b>  | <b>-0.20</b> | <b>0.41</b>  |
| Sand*   | <b>0.41</b>  | <b>0.19</b> | <b>0.49</b>  | <b>0.26</b>  | <b>0.35</b> | <b>0.59</b>  | <b>0.30</b>  | <b>0.34</b>  |
| Silt    | <b>0.16</b>  | <b>0.31</b> | <b>0.196</b> | <b>0.29</b>  | <b>0.15</b> | <b>0.23</b>  | <b>0.16</b>  | <b>0.40</b>  |
| Clay    | <b>0.16</b>  | <b>0.19</b> | 0.05         | <b>0.26</b>  | 0.11        | 0.07         | <b>0.19</b>  | <b>0.24</b>  |
| Prec    | -0.07        | -0.09       | 0.02         | <b>-0.25</b> | 0.02        | <b>-0.13</b> | <b>-0.45</b> | <b>-0.30</b> |
| Temp    | <b>0.35</b>  | <b>0.33</b> | <b>0.32</b>  | 0.11         | <b>0.36</b> | <b>0.17</b>  | <b>-0.21</b> | 0.09         |
| GDP     | <b>0.12</b>  | <b>0.15</b> | 0.03         | <b>0.27</b>  | 0.06        | <b>0.18</b>  | <b>0.34</b>  | <b>0.25</b>  |
| Pop     | <b>0.51</b>  | <b>0.37</b> | <b>0.33</b>  | <b>0.32</b>  | <b>0.22</b> | <b>0.37</b>  | <b>0.24</b>  | <b>0.34</b>  |
| DisRd*  | <b>0.13</b>  | <b>0.13</b> | 0.04         | 0.06         | 0.03        | 0.09         | -0.05        | 0.05         |
| DsiRv*  | 0            | 0.1         | 0            | -0.07        | <b>0.17</b> | 0.01         | -0.04        | -0.01        |
| DisInd* | 0.05         | 0.06        | <b>0.13</b>  | <b>0.17</b>  | 0.01        | 0.08         | <b>0.15</b>  | <b>0.13</b>  |
| NDVI*   | <b>0.41</b>  | <b>0.41</b> | <b>0.29</b>  | <b>0.35</b>  | <b>0.22</b> | <b>0.26</b>  | <b>0.16</b>  | <b>0.33</b>  |
| HEAs    | <b>0.15</b>  | 0.09        | <b>0.18</b>  | <b>0.17</b>  | 0.05        | <b>0.17</b>  | <b>0.24</b>  | <b>0.21</b>  |
| HECd    | <b>0.21</b>  | <b>0.12</b> | <b>0.24</b>  | <b>0.22</b>  | 0.09        | <b>0.21</b>  | <b>0.28</b>  | <b>0.28</b>  |
| HECr    | <b>0.18</b>  | 0.1         | <b>0.20</b>  | <b>0.18</b>  | 0.08        | <b>0.16</b>  | <b>0.25</b>  | <b>0.23</b>  |
| HEHg    | <b>0.34</b>  | <b>0.24</b> | <b>0.26</b>  | <b>0.27</b>  | <b>0.16</b> | <b>0.27</b>  | <b>0.24</b>  | <b>0.31</b>  |
| HEPb    | <b>0.25</b>  | <b>0.19</b> | <b>0.27</b>  | <b>0.27</b>  | <b>0.15</b> | <b>0.25</b>  | <b>0.33</b>  | <b>0.33</b>  |

**Table S3.** Structure correlation coefficients among soil contamination and environmental variables. The \* represents the reciprocals of the variables.

| <b>Nugget effect</b>         |       |       |       |       |       |       |       |       |
|------------------------------|-------|-------|-------|-------|-------|-------|-------|-------|
|                              | As    | Cd    | Cr    | Cu    | Hg    | Ni    | Pb    | Zn    |
| pH                           | -0.33 | 0.03  | -0.25 | -0.13 | -0.26 | -0.19 | 0.12  | 0.05  |
| SOM                          | 0.03  | 0.37  | 0.46  | 0.45  | 0.57  | 0.71  | -0.07 | 0.65  |
| Sand*                        | 0.55  | 0.04  | 0.49  | 0.42  | 0.41  | 0.6   | 0.3   | 0.37  |
| Silt                         | 0.3   | 0.13  | 0.3   | 0.24  | 0.29  | 0.49  | 0.17  | 0.48  |
| Clay                         | 0.43  | 0.12  | 0.32  | 0.07  | 0.07  | 0.27  | 0.3   | 0.17  |
| Prec                         | 0.23  | 0.26  | 0.15  | 0.3   | -0.04 | 0.13  | 0.51  | 0.35  |
| Temp                         | -0.32 | -0.53 | -0.19 | 0.05  | -0.25 | -0.02 | 0     | -0.17 |
| GDP                          | 0.28  | 0.05  | 0.34  | -0.05 | -0.01 | 0.15  | -0.3  | -0.02 |
| Pop                          | -0.02 | 0.24  | 0.12  | -0.06 | 0.06  | 0.15  | 0.01  | 0.15  |
| DisRd*                       | 0.04  | 0.28  | -0.07 | -0.04 | -0.05 | 0.12  | -0.05 | 0.16  |
| DsiRv*                       | -0.15 | -0.05 | -0.05 | -0.1  | -0.21 | 0.05  | -0.08 | -0.14 |
| DisInd*                      | -0.25 | -0.02 | -0.59 | -0.49 | -0.09 | -0.25 | -0.54 | -0.12 |
| NDVI*                        | 0.1   | 0.2   | 0.32  | 0.15  | 0.1   | 0.19  | 0.45  | 0.21  |
| HEAs                         | 0.11  | 0.07  | -0.05 | 0.17  | -0.11 | -0.13 | 0.33  | 0.05  |
| HECd                         | 0.04  | -0.17 | -0.26 | -0.19 | 0.01  | -0.33 | -0.02 | -0.26 |
| HECr                         | 0.31  | 0.09  | 0.19  | 0.18  | -0.08 | 0.04  | 0.54  | 0     |
| HEHg                         | -0.42 | -0.5  | -0.43 | -0.31 | -0.13 | -0.38 | -0.23 | -0.31 |
| HEPb                         | -0.02 | -0.22 | -0.22 | -0.35 | -0.16 | -0.32 | -0.4  | -0.36 |
| <b>Short structure (3km)</b> |       |       |       |       |       |       |       |       |
| pH                           | 0.57  | 0.5   | 0.38  | 0.56  | 0.06  | 0.27  | 0.49  | 0.6   |
| SOM                          | 0.44  | 0.33  | -0.12 | -0.03 | 0.1   | 0.12  | -0.41 | 0.31  |
| Sand*                        | 0.19  | 0.27  | 0.33  | 0.06  | 0.03  | 0.39  | 0.53  | 0.09  |
| Silt                         | 0.03  | 0.3   | 0.11  | 0.06  | -0.27 | 0.06  | -0.03 | 0.3   |
| Clay                         | 0.4   | 0.12  | -0.13 | 0.5   | 0.25  | -0.16 | -0.04 | 0.4   |
| Prec                         | -0.37 | -0.27 | -0.33 | -0.32 | -0.16 | -0.3  | -0.05 | -0.37 |
| Temp                         | 0.04  | 0.11  | 0.06  | -0.31 | 0.02  | -0.04 | -0.14 | -0.09 |
| GDP                          | -0.61 | -0.56 | -0.11 | -0.43 | -0.27 | -0.15 | -0.55 | -0.52 |
| Pop                          | -0.59 | -0.67 | -0.11 | -0.23 | -0.44 | -0.38 | -0.21 | -0.3  |
| DisRd*                       | -0.34 | -0.54 | -0.28 | -0.02 | 0.11  | -0.58 | 0.03  | -0.41 |
| DsiRv*                       | 0.21  | 0.11  | 0.08  | 0.11  | 0.4   | -0.16 | 0.24  | 0.22  |
| DisInd*                      | -0.05 | -0.22 | 0.02  | -0.04 | 0.03  | -0.03 | 0.25  | -0.05 |
| NDVI*                        | -0.63 | -0.48 | -0.51 | -0.38 | -0.7  | -0.3  | -0.4  | -0.4  |
| HEAs                         | -0.14 | -0.15 | -0.35 | -0.47 | 0.05  | -0.1  | -0.57 | -0.49 |
| HECd                         | -0.05 | -0.01 | -0.27 | -0.35 | 0.05  | -0.14 | -0.31 | -0.26 |
| HECr                         | 0.05  | -0.07 | -0.46 | -0.21 | 0.13  | -0.18 | -0.46 | -0.23 |
| HEHg                         | -0.15 | 0.02  | 0     | -0.3  | -0.02 | -0.02 | 0     | -0.04 |
| HEPb                         | -0.06 | 0     | -0.15 | -0.35 | 0.14  | -0.1  | -0.2  | -0.22 |
| <b>Long structure (12km)</b> |       |       |       |       |       |       |       |       |
| pH                           | 0.32  | 0.46  | 0.29  | 0.45  | 0.28  | 0.1   | 0.18  | 0.19  |

|         |       |       |       |       |       |       |       |       |
|---------|-------|-------|-------|-------|-------|-------|-------|-------|
| SOM     | -0.41 | -0.01 | -0.46 | -0.19 | 0.25  | -0.28 | -0.35 | -0.41 |
| Sand*   | 0.25  | 0.07  | 0.24  | -0.2  | 0.26  | 0.59  | 0.17  | 0.3   |
| Silt    | -0.05 | 0.23  | -0.11 | 0.4   | 0.15  | -0.31 | 0.07  | 0.12  |
| Clay    | -0.1  | 0.21  | -0.28 | 0.4   | 0.13  | -0.4  | 0.1   | 0.16  |
| Prec    | 0.05  | -0.06 | 0.08  | -0.27 | 0.13  | -0.07 | -0.41 | -0.37 |
| Temp    | 0.28  | 0.62  | 0.35  | 0.43  | 0.57  | 0.23  | -0.18 | 0.25  |
| GDP     | 0.04  | 0.32  | 0.04  | 0.46  | 0.2   | 0.18  | 0.43  | 0.42  |
| Pop     | 0.44  | 0.48  | 0.44  | 0.47  | 0.26  | 0.57  | 0.2   | 0.35  |
| DisRd*  | 0.41  | 0.16  | 0.49  | 0.4   | -0.17 | 0.49  | -0.13 | 0.08  |
| DsiRv*  | -0.05 | 0.35  | -0.16 | -0.19 | 0.71  | 0.16  | -0.1  | 0.24  |
| DisInd* | 0.05  | 0.26  | 0.56  | 0.68  | -0.02 | 0.2   | -0.05 | 0.2   |
| NDVI*   | 0.45  | 0.73  | 0.38  | 0.7   | 0.47  | 0.2   | 0.08  | 0.48  |
| HEAs    | -0.03 | -0.07 | 0.25  | 0.1   | -0.07 | 0.14  | 0.16  | 0.18  |
| HECd    | 0.04  | -0.08 | 0.31  | 0.26  | -0.12 | 0.23  | 0.18  | 0.3   |
| HECr    | -0.02 | -0.11 | 0.29  | 0.12  | -0.11 | 0.16  | 0.26  | 0.24  |
| HEHg    | 0.13  | 0.16  | 0.21  | 0.31  | 0.04  | 0.2   | -0.1  | 0.18  |
| HEPb    | 0.05  | 0.07  | 0.35  | 0.35  | 0.03  | 0.28  | 0.24  | 0.38  |

---

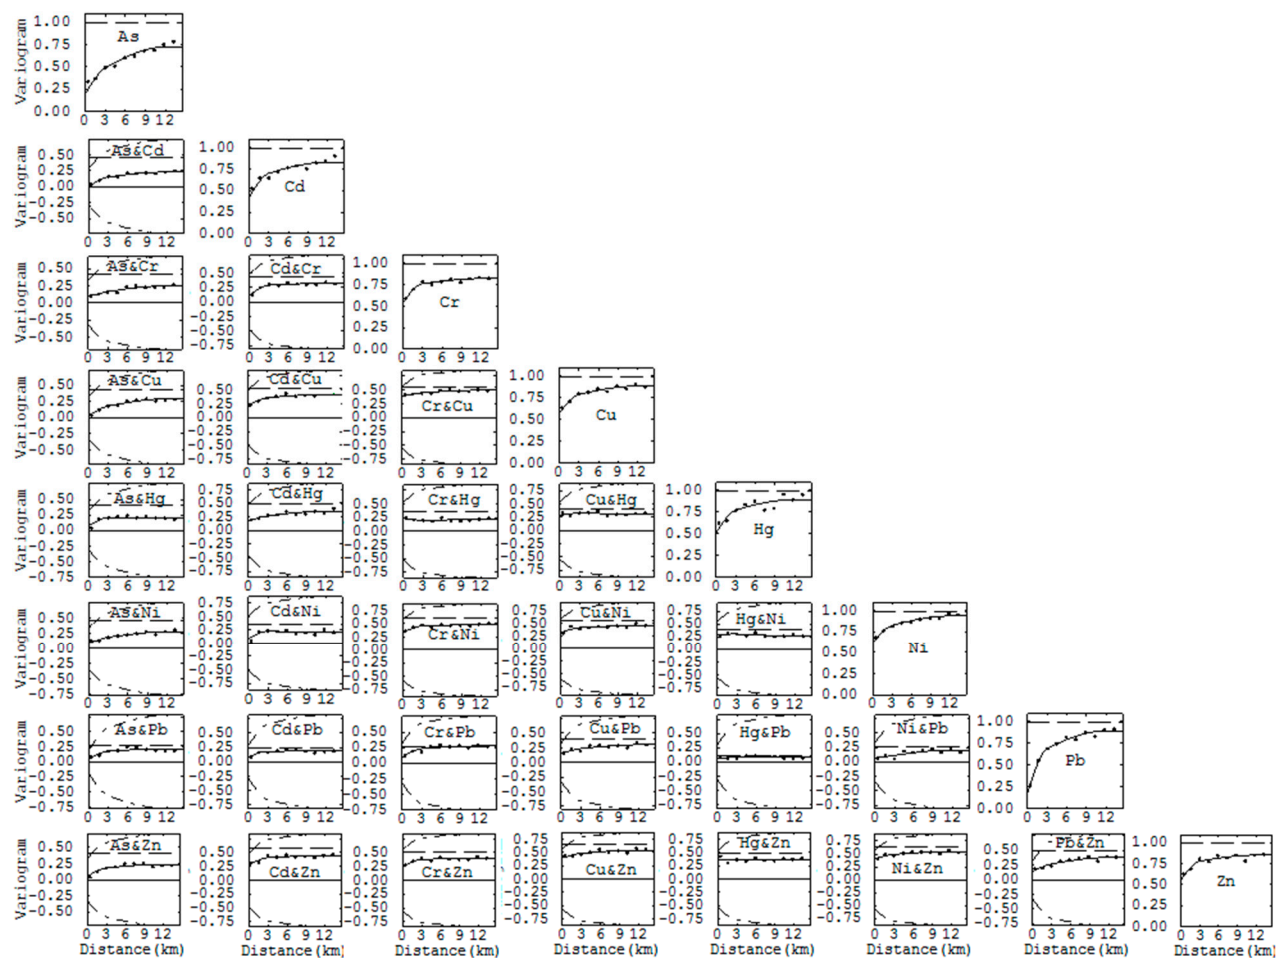

**Figure S1.** Variogram and cross-variogram maps for the eight heavy metals. The plotted points, solid lines, dash-dotted lines, and dashed lines represent the experimental values, the model of coregionalization and the hull of perfect correlation, and the experimental variances, respectively.

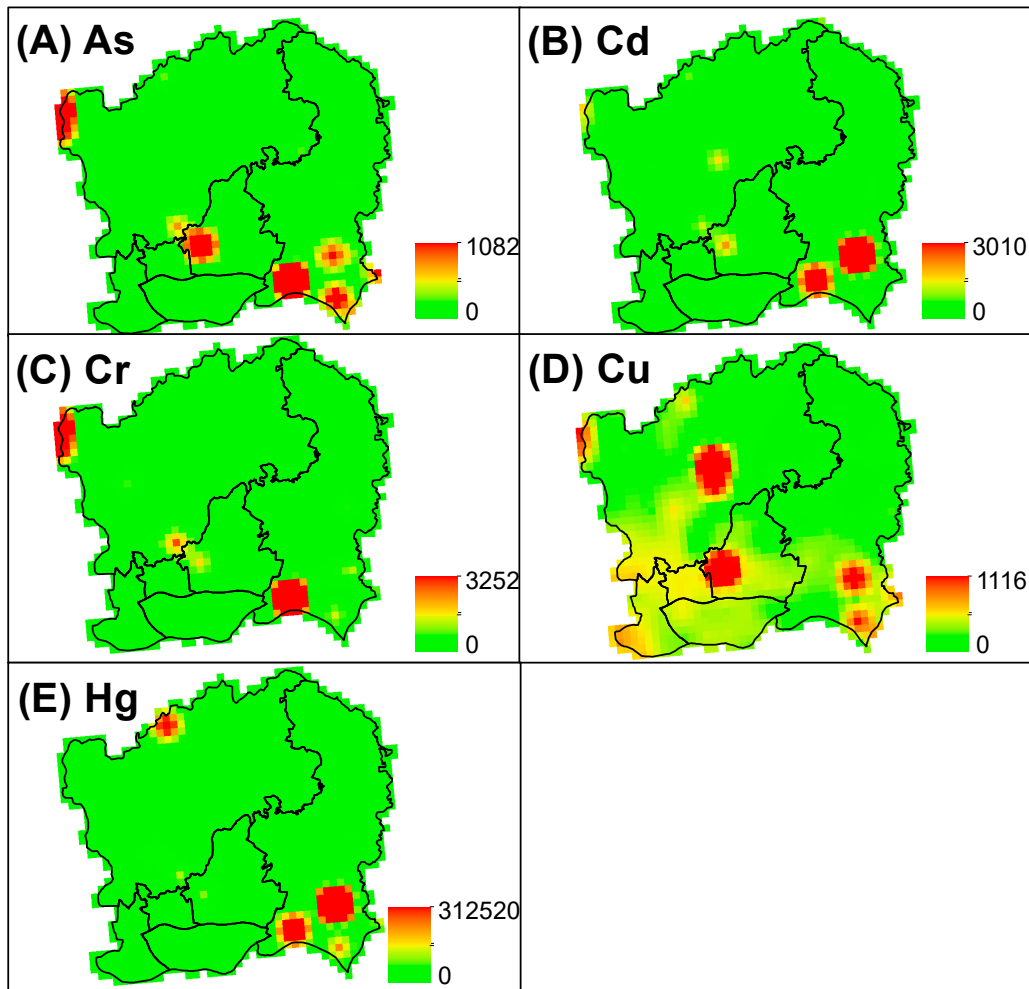

**Figure S2.** Atmospheric emissions for heavy metals (Unit: g)
